# Supplementary material
Source: PubMed Central journal article supplement (PMC3448871)
Supplement: NIHMS396369-supplement-01.pdf [file NIHMS396369-supplement-01.pdf]

# Supplemental Fig. 1

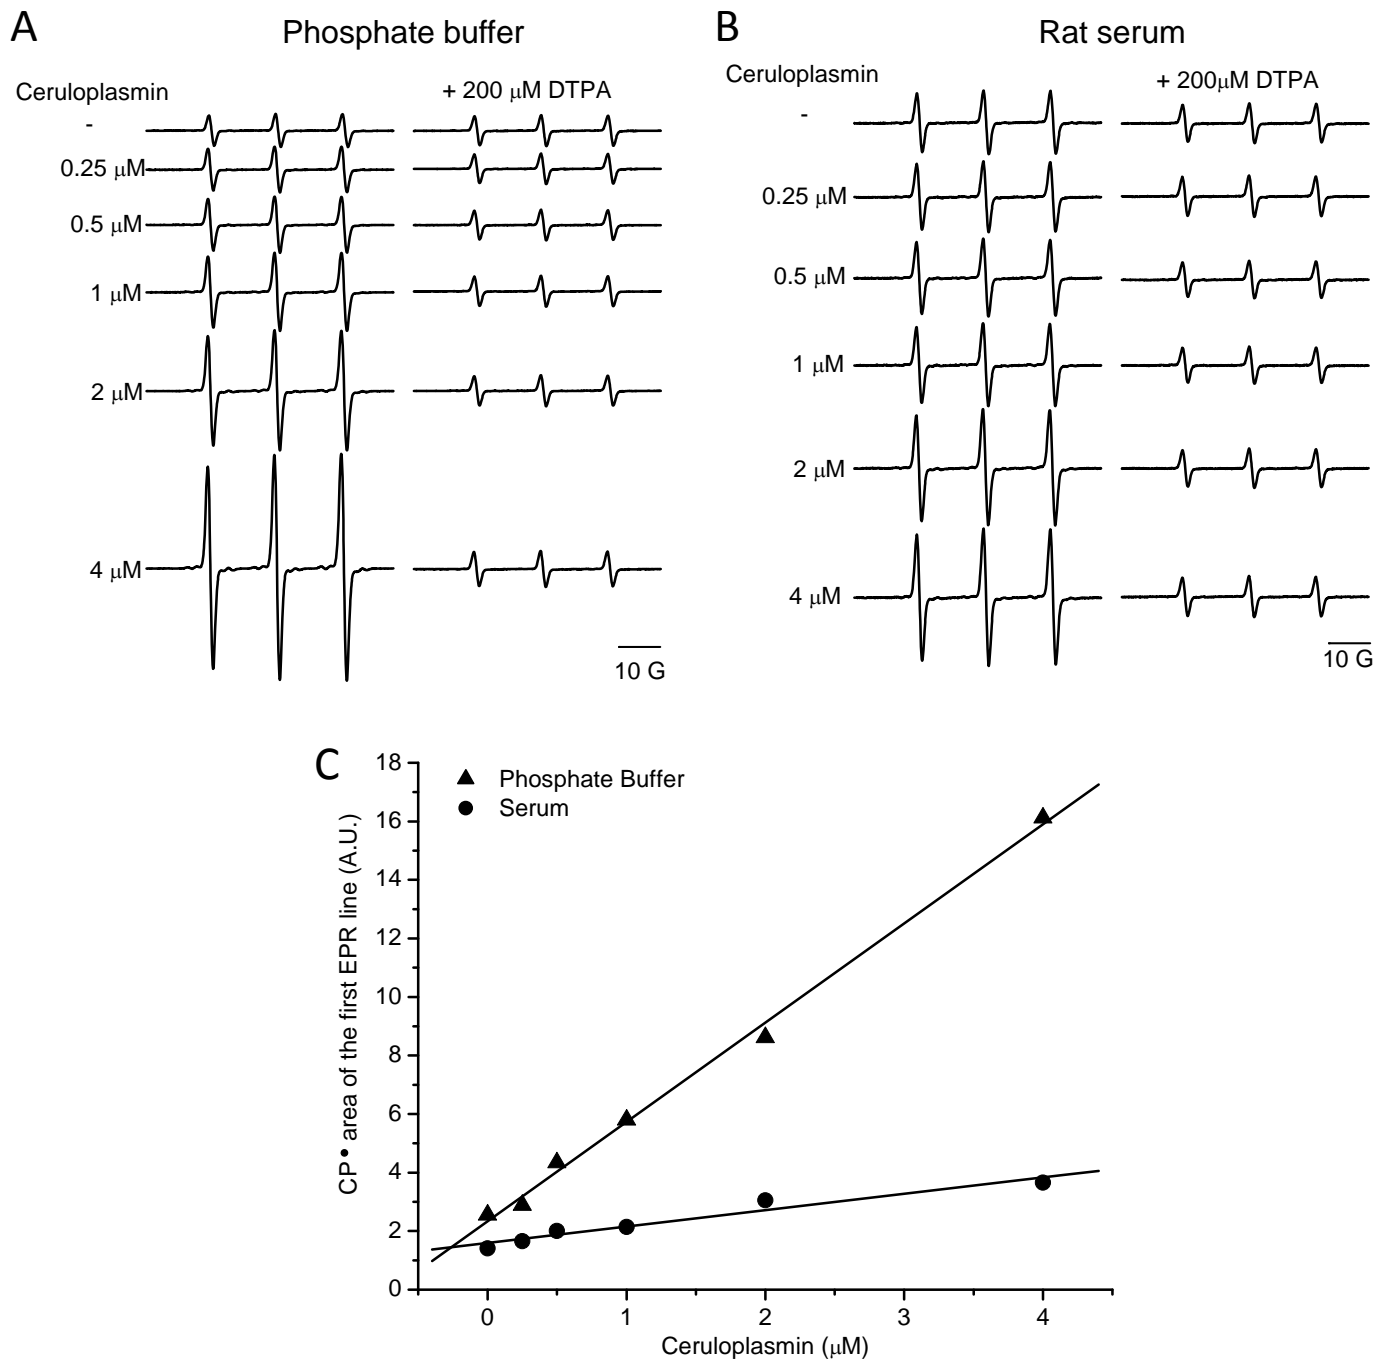

Supplemental Fig. 1. Ceruloplasmin-mediated, dose-dependent formation of CPH-nitroxide in Chelex-treated phosphate buffer and rat serum samples. Reaction mixtures were composed of 1 mM CPH and ceruloplasmin prepared with (A) Chelex-treated phosphate buffer or (B) rat serum with and without DTPA (200  $\mu\text{M}$ ). (C) Area of the CPH-nitroxide signal are shown to be linearly correlated to the ceruloplasmin added to the samples.

## Supplemental Fig. 2

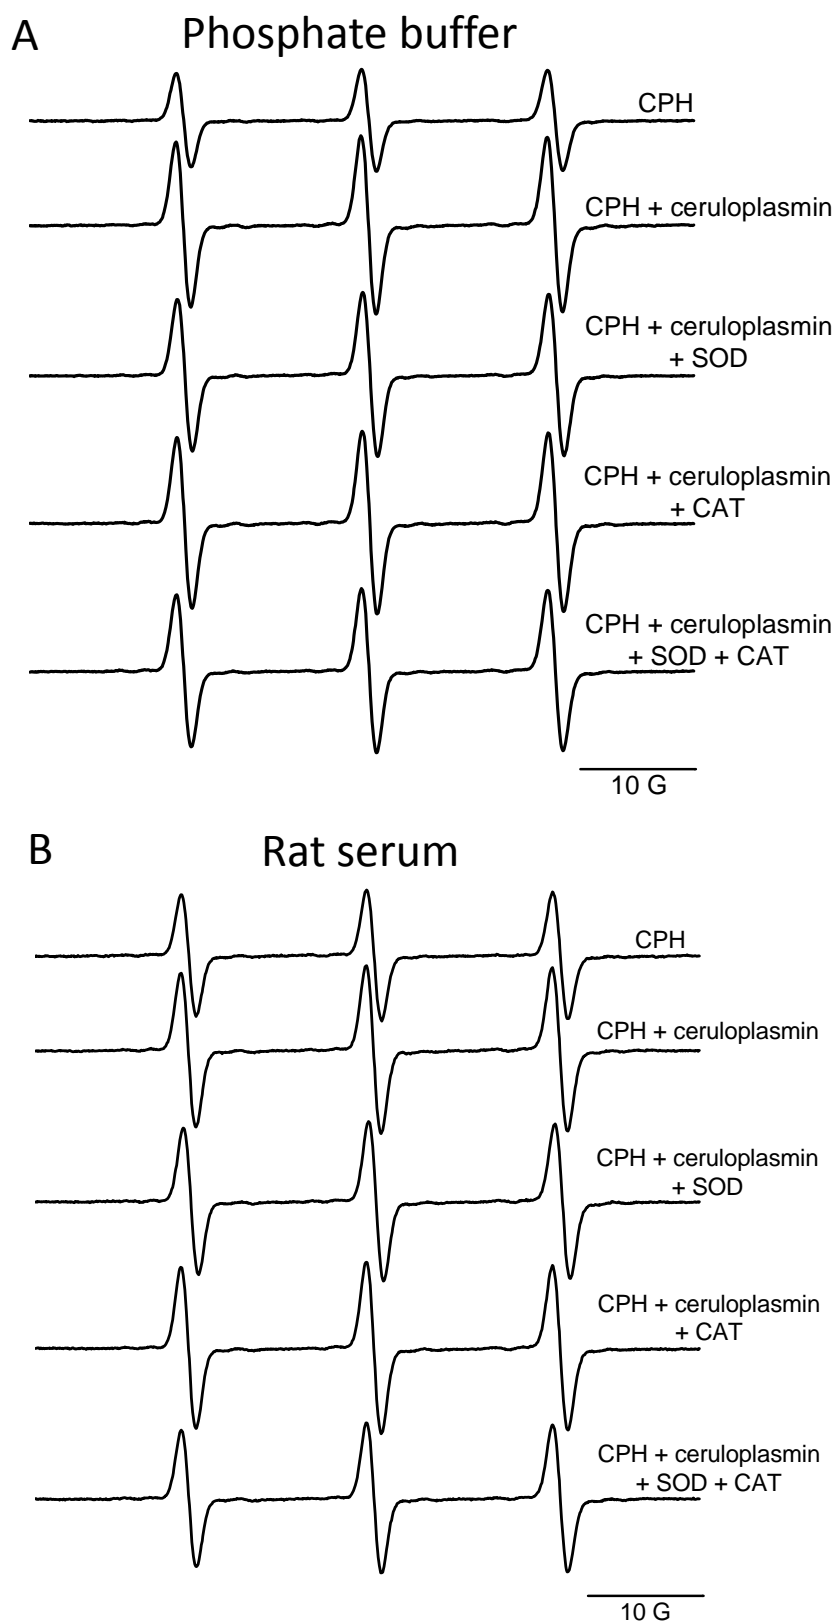

Supplemental Fig. 2. Effect of SOD and catalase on CPH-nitroxide formation catalyzed by ceruloplasmin in samples prepared with (A) Chelex-treated phosphate buffer or (B) rat serum. Spectra were taken for reaction mixtures containing 1 mM CPH and 1  $\mu$ M ceruloplasmin in the presence of SOD (50 U/mL) and/or catalase (650 U/mL).
